# Supplementary material for: A novel two-dimensional Janus TiSiGeN4 monolayer with N vacancies for efficient photocatalytic nitrogen reduction
Source: Royal Society of Chemistry journal article supplement (doi:10.1039/d3cp06302j), 2024-01-01
Supplement: d3cp06302j1.pdf [file d3cp06302j1.pdf]

**Novel two-dimensional Janus TiSiGeN<sub>4</sub> monolayer with N vacancies  
for efficient photocatalytic nitrogen reduction**

Zhe Sun,<sup>ac</sup> Rongfeng Guan,<sup>b</sup> Huimin Li,<sup>ac</sup> Shilong Feng,<sup>ac</sup> Lin Ma,<sup>ac</sup> Qianqian Shen,<sup>\*ac</sup>

Lixia Ling,<sup>d</sup> Husheng Jia<sup>ace</sup> and Jinbo Xue<sup>\*ac</sup>

*<sup>a</sup>Key Laboratory of Interface Science and Engineering in Advanced Materials (Taiyuan University of Technology), Ministry of Education, Taiyuan 030024, P. R. China. E-mail address: [xuejinbo@tyut.edu.cn](mailto:xuejinbo@tyut.edu.cn), [shenqianqian@tyut.edu.cn](mailto:shenqianqian@tyut.edu.cn)*

*<sup>b</sup>Key Laboratory for Advanced Technology in Environmental Protection of Jiangsu Province, Yancheng Institute of Technology, Yancheng 224051, P. R. China*

*<sup>c</sup>College of Materials Science and Engineering, Taiyuan University of Technology, Taiyuan 030024, P. R. China*

*<sup>d</sup>College of Chemistry and Chemical Engineering, Taiyuan University of Technology, Taiyuan 030024, P. R. China*

*<sup>e</sup>Shanxi-Zheda Institute of Advanced Materials and Chemical Engineering, Taiyuan 030032, P. R. China*

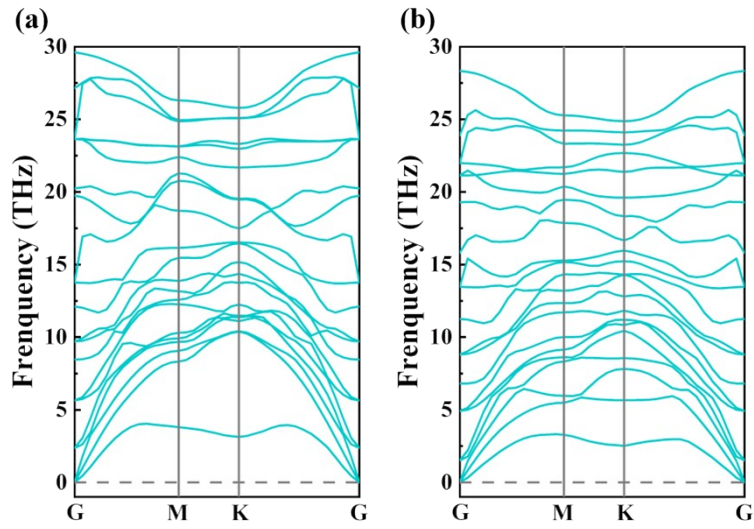

**Fig. S1** Phonon dispersion curves for (a)  $\text{TiSi}_2\text{N}_4$  and (b)  $\text{TiSiGeN}_4$ .

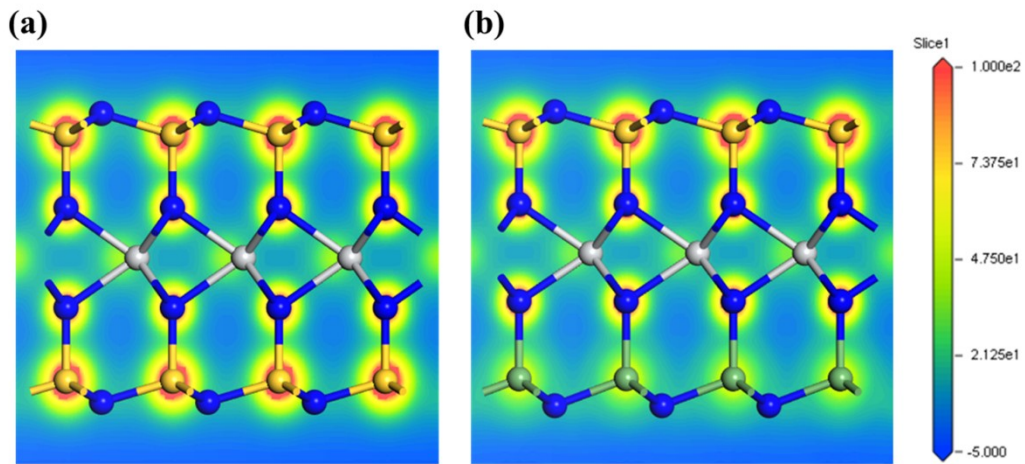

**Fig. S2** Profile of electrostatic potential of (a)  $\text{TiSi}_2\text{N}_4$  and (b)  $\text{TiSiGeN}_4$ . The different colors in the picture represent different electron densities, as shown in the scale on the right.

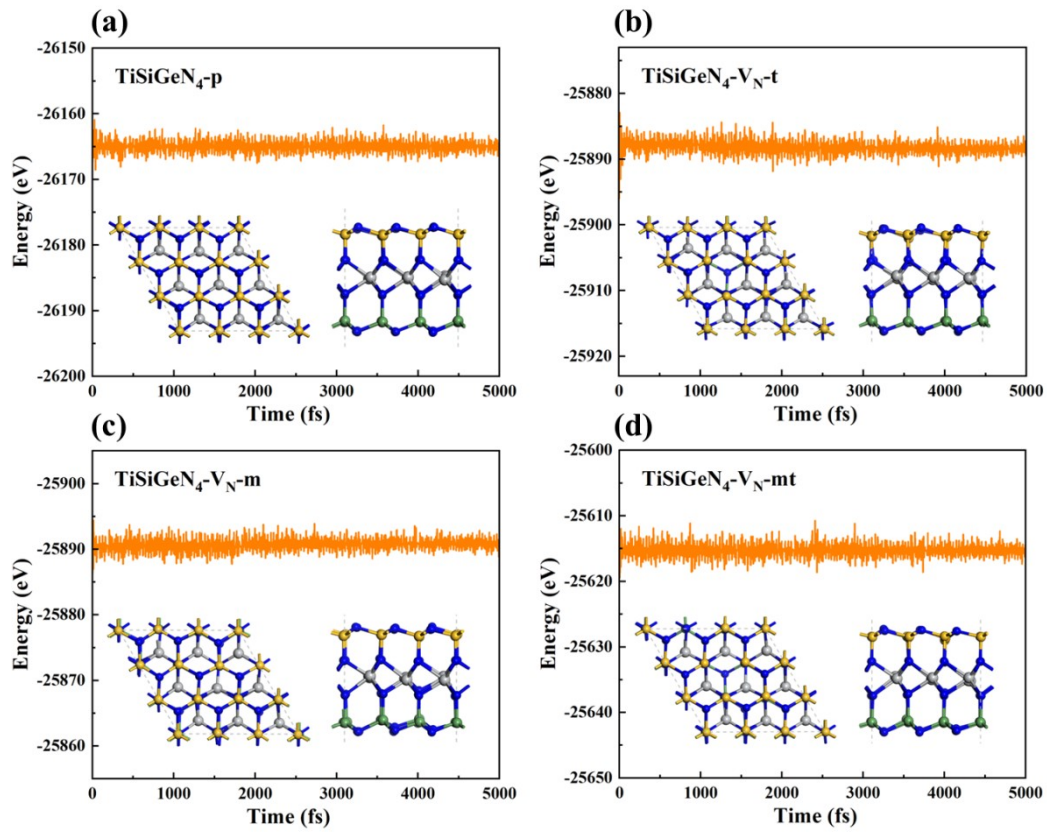

**Fig. S3** Variations of the total energy versus time for AIMD simulations of Janus  $\text{TiSiGeN}_4$  with different N vacancies. The AIMD runs under 500 K for 5 ps with a time step of 1 fs.

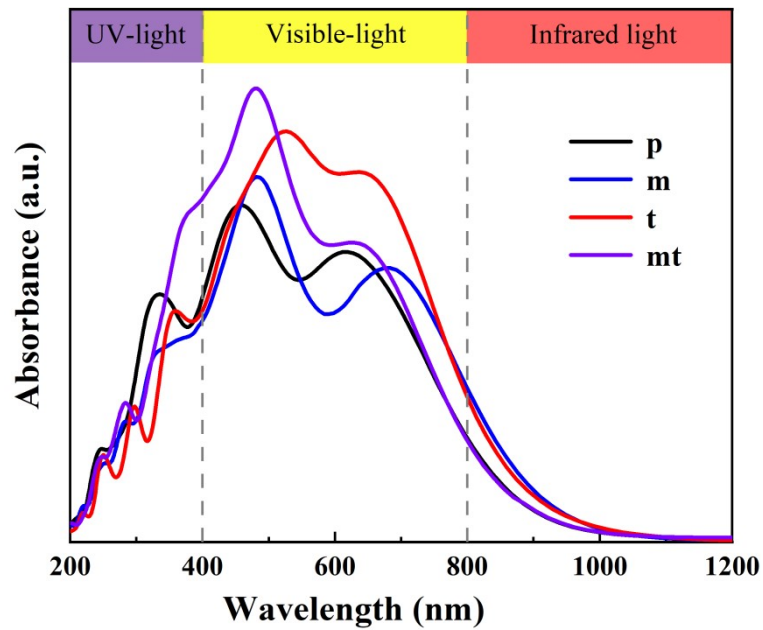

**Fig. S4** Optical absorption spectra of  $\text{TiSiGeN}_4$ -p,  $\text{TiSiGeN}_4$ - $V_N$ -t,  $\text{TiSiGeN}_4$ - $V_N$ -m, and  $\text{TiSiGeN}_4$ - $V_N$ -mt.

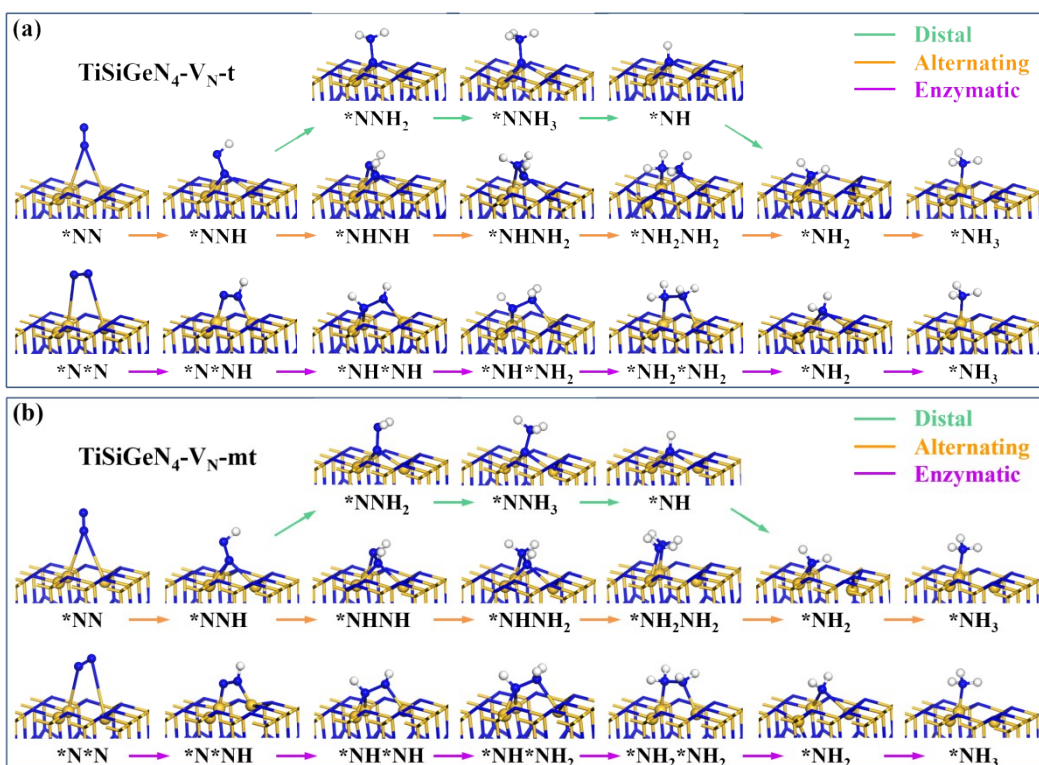

**Fig. S5** Optimized structures of various intermediates along the reaction paths of the NRR proceeding on the (a)  $\text{TiSiGeN}_4\text{-V}_\text{N}\text{-t}$  and (b)  $\text{TiSiGeN}_4\text{-V}_\text{N}\text{-mt}$  surfaces through distal, alternating and enzymatic pathways.

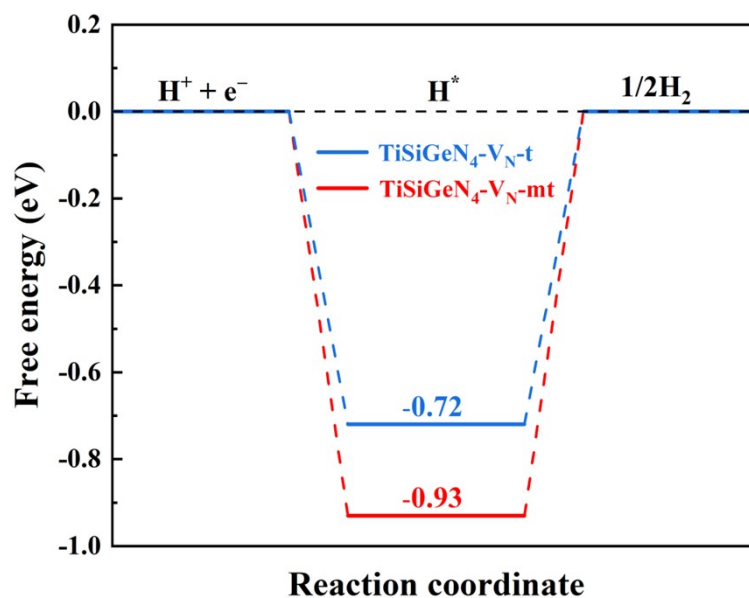

**Fig. S6** Free energy diagrams for HER on  $\text{TiSiGeN}_4\text{-V}_\text{N}\text{-t}$  and  $\text{TiSiGeN}_4\text{-V}_\text{N}\text{-mt}$ .

**Table S1** Free energy corrections:  $E_{ZPE}$  and  $S$  represent the zero-point energy change and the entropy change of intermediate for NRR on  $\text{TiSiGeN}_4\text{-V}_\text{N-t}$ , where \* denoted the adsorption site.

| Species                           | $E_{ZPE}$ (eV) | $TS$ (eV) | $E_{ZPE} - TS$ (eV) |
|-----------------------------------|----------------|-----------|---------------------|
| *NN                               | 0.23           | 0.08      | 0.15                |
| *NNH                              | 0.55           | 0.09      | 0.46                |
| *NNH <sub>2</sub>                 | 0.84           | 0.11      | 0.73                |
| *NNH <sub>3</sub>                 | 1.01           | 0.13      | 0.88                |
| *NH                               | 0.41           | 0.03      | 0.38                |
| *NH <sub>2</sub>                  | 0.69           | 0.09      | 0.60                |
| *NH <sub>3</sub>                  | 0.96           | 0.12      | 0.84                |
| *NHNH                             | 0.80           | 0.11      | 0.69                |
| *NHNH <sub>2</sub>                | 0.99           | 0.14      | 0.85                |
| *NH <sub>2</sub> NH <sub>2</sub>  | 1.27           | 0.16      | 1.11                |
| *N*N                              | 0.21           | 0.06      | 0.15                |
| *N*NH                             | 0.53           | 0.08      | 0.45                |
| *NH*NH                            | 0.79           | 0.10      | 0.69                |
| *NH*NH <sub>2</sub>               | 0.91           | 0.16      | 0.75                |
| *NH <sub>2</sub> *NH <sub>2</sub> | 1.24           | 0.18      | 1.06                |
| *NH <sub>2</sub>                  | 0.68           | 0.08      | 0.60                |
| *NH <sub>3</sub>                  | 0.96           | 0.12      | 0.84                |
| *H                                | 0.18           | 0.16      | 0.02                |
| H <sub>2</sub>                    | 0.27           | 0.41      | -0.14               |
| N <sub>2</sub>                    | 0.15           | 0.60      | -0.45               |

|                       |      |      |      |
|-----------------------|------|------|------|
| <b>NH<sub>3</sub></b> | 0.94 | 0.60 | 0.34 |
|-----------------------|------|------|------|

**Table S2.** Free energy corrections:  $E_{ZPE}$  and  $S$  represent the zero-point energy change and the entropy change of intermediate for NRR on TiSiGeN<sub>4</sub>-V<sub>N</sub>-mt, where \* denoted the adsorption site.

| <b>Species</b>                        | <b><math>E_{ZPE}</math> (eV)</b> | <b><math>TS</math> (eV)</b> | <b><math>E_{ZPE} - TS</math> (eV)</b> |
|---------------------------------------|----------------------------------|-----------------------------|---------------------------------------|
| <b>*NN</b>                            | 0.25                             | 0.10                        | 0.15                                  |
| <b>*NNH</b>                           | 0.57                             | 0.10                        | 0.47                                  |
| <b>*NNH<sub>2</sub></b>               | 0.86                             | 0.11                        | 0.75                                  |
| <b>*NNH<sub>3</sub></b>               | 1.09                             | 0.12                        | 0.97                                  |
| <b>*NH</b>                            | 0.45                             | 0.03                        | 0.42                                  |
| <b>*NH<sub>2</sub></b>                | 0.69                             | 0.09                        | 0.60                                  |
| <b>*NH<sub>3</sub></b>                | 0.92                             | 0.16                        | 0.76                                  |
| <b>*NHNH</b>                          | 0.82                             | 0.09                        | 0.73                                  |
| <b>*NHNH<sub>2</sub></b>              | 1.00                             | 0.14                        | 0.86                                  |
| <b>*NH<sub>2</sub>NH<sub>2</sub></b>  | 1.30                             | 0.18                        | 1.12                                  |
| <b>*N*N</b>                           | 0.28                             | 0.04                        | 0.15                                  |
| <b>*N*NH</b>                          | 0.56                             | 0.04                        | 0.45                                  |
| <b>*NH*NH</b>                         | 0.84                             | 0.06                        | 0.78                                  |
| <b>*NH*NH<sub>2</sub></b>             | 0.99                             | 0.10                        | 0.89                                  |
| <b>*NH<sub>2</sub>*NH<sub>2</sub></b> | 1.25                             | 0.17                        | 1.08                                  |
| <b>*NH<sub>2</sub></b>                | 0.70                             | 0.09                        | 0.61                                  |
| <b>*NH<sub>3</sub></b>                | 0.93                             | 0.17                        | 0.76                                  |
| <b>*H</b>                             | 0.18                             | 0.17                        | 0.01                                  |

|                       |      |      |       |
|-----------------------|------|------|-------|
| <b>H<sub>2</sub></b>  | 0.27 | 0.41 | -0.14 |
| <b>N<sub>2</sub></b>  | 0.15 | 0.60 | -0.45 |
| <b>NH<sub>3</sub></b> | 0.94 | 0.60 | 0.34  |
